# Supplementary figures and images for: A nurse-led sexual rehabilitation intervention after radiotherapy for gynecological cancer
Source: Springer Nature journal article supplement (doi:10.1007/s00520-016-3453-2), 2016-10-26

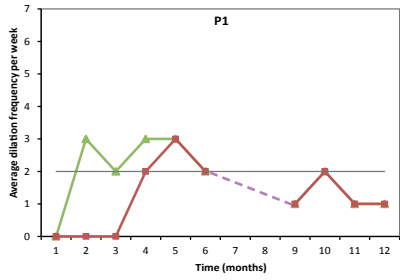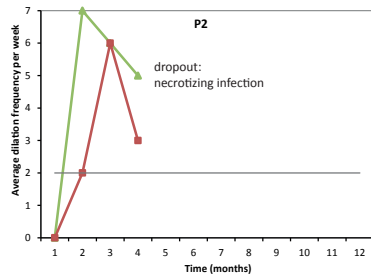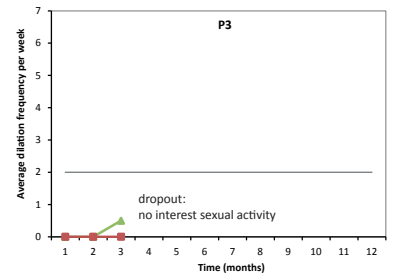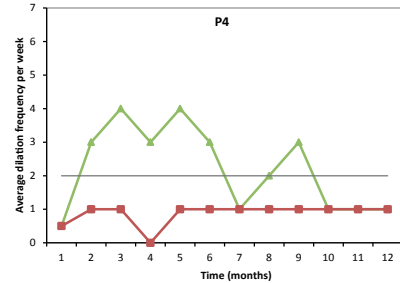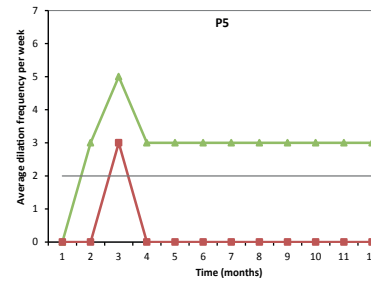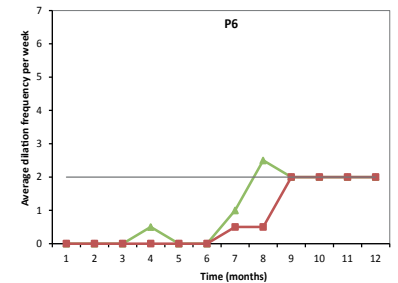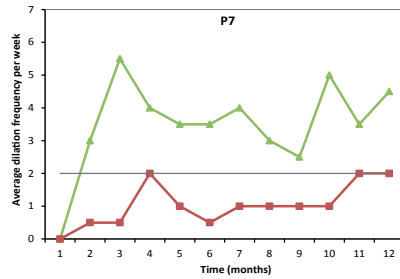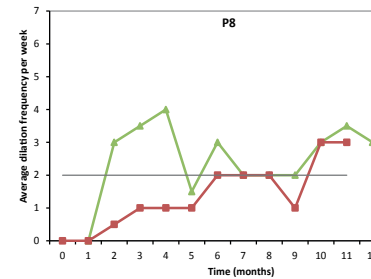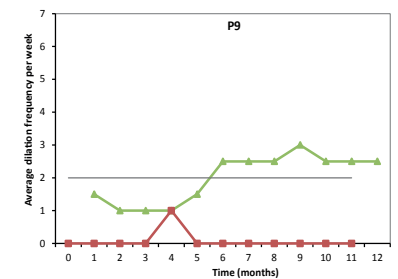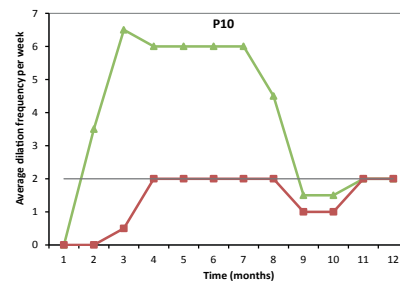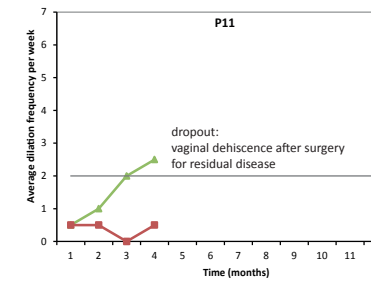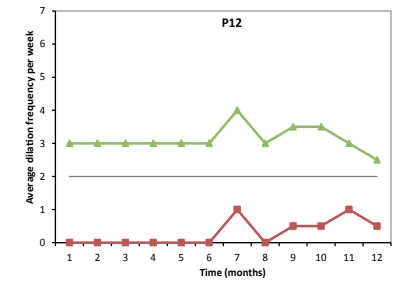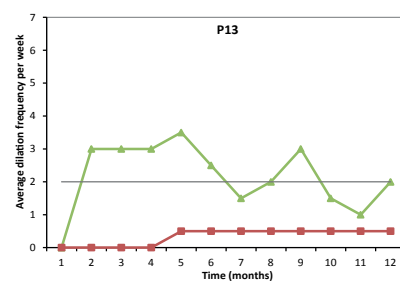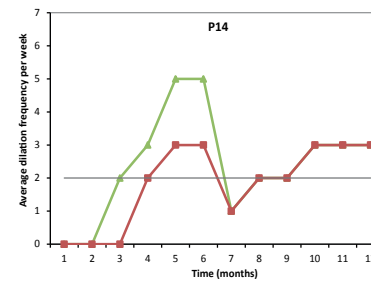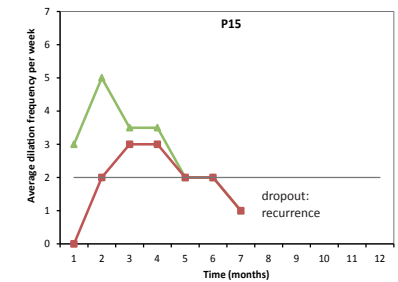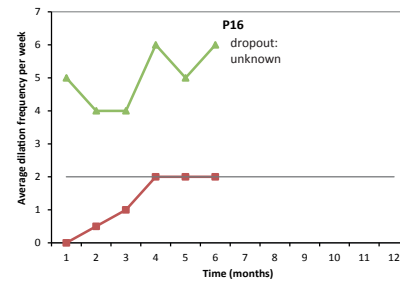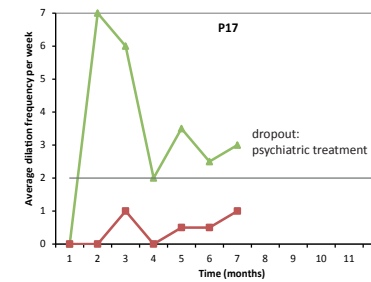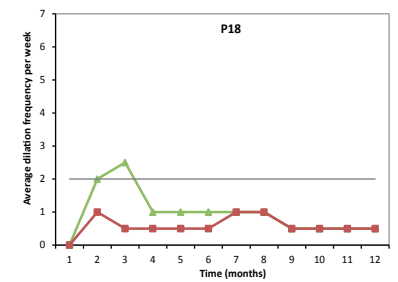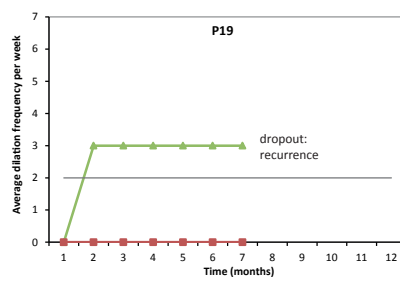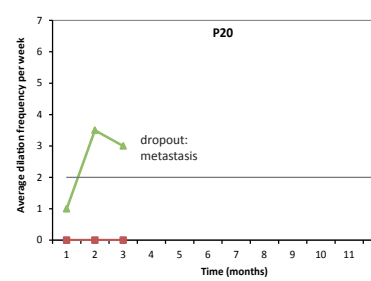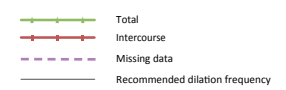

Supplement: MOESM2 [file 10990894]
